# Supplementary material for: Role of a perhydroxyl radical in the chelator-mediated Fenton reaction
Source: Royal Society of Chemistry journal article supplement (doi:10.1039/d1nj05674c), 2022-01-01
Supplement: d1nj05674c1.pdf [file d1nj05674c1.pdf]

## **Role of perhydroxyl radical in the chelator-mediated Fenton reaction**

Gabriel Perez-Gonzalez<sup>a</sup> Victoria Melin<sup>\*a,b</sup> Camila Mendez-Rivas<sup>a</sup> Juan Diaz<sup>a,b</sup>, Nataly Moreno<sup>a</sup>; David Contreras<sup>\*a,b</sup>

<sup>a</sup> Departamento de Química Analítica e Inorgánica, Facultad de Ciencias Químicas, Universidad de Concepción, Concepción, Chile

<sup>b</sup> ANID - Millennium Science Initiative Program – Millennium Nuclei on Catalytic Processes towards Sustainable Chemistry (CSC), Chile

### **Electronic Supplementary information**

**Table S1.** Catecholates ligands classified as electron donor (ED) or electron withdrawer (EW) according to their Hammett parameters. Hammett parameter were calculated by Salgado *et al.*<sup>1</sup>.

| Name                      | Hammett parameter |            |                                        |
|---------------------------|-------------------|------------|----------------------------------------|
|                           | $\sigma_m$        | $\sigma_p$ | $\Sigma\sigma = (\sigma_m + \sigma_p)$ |
| 4-tert-butylcatechol      | -0.10             | -0.20      | -0.30 (ED)                             |
| 4-methylcatechol          | -0.07             | -0.15      | -0.22 (ED)                             |
| Catechol                  | 0                 | 0          | 0                                      |
| 3,4-dihydroxybenzoic acid | 0.37              | 0.42       | 0.87 (EW)                              |
| 4-nitrocatechol           | 0.71              | 0.78       | 1.49 (EW)                              |

\*ED: electron donor; EW: electron withdrawer

(A)

| Radical adduct                        | Coupling constant (G) |             |              | Source                                  |
|---------------------------------------|-----------------------|-------------|--------------|-----------------------------------------|
|                                       | $a_N$                 | $a_\beta^H$ | $a_\gamma^H$ |                                         |
| DMPO-HO $\cdot$                       | 14.9                  | 14.9        |              | Bruker tech bull. <sup>20</sup>         |
| DMPO-HO $_2\cdot$                     | 14.2                  | 11.4        | 1.2          | Bruker tech bull. <sup>20</sup>         |
| POBN-HO $\cdot$                       | 14.97                 | 1.68        | 0.33         | Finkelstein <i>et al.</i> <sup>18</sup> |
| POBN-HO $_2\cdot$                     | 14.18                 | 1.72        |              | Finkelstein <i>et al.</i> <sup>18</sup> |
| DMPO adduct detected (-HO $\cdot$ )   | 14.93                 | 14.93       |              | This work                               |
| POBN adduct detected (-HO $_2\cdot$ ) | 14.22                 | 1.69        |              | This work                               |

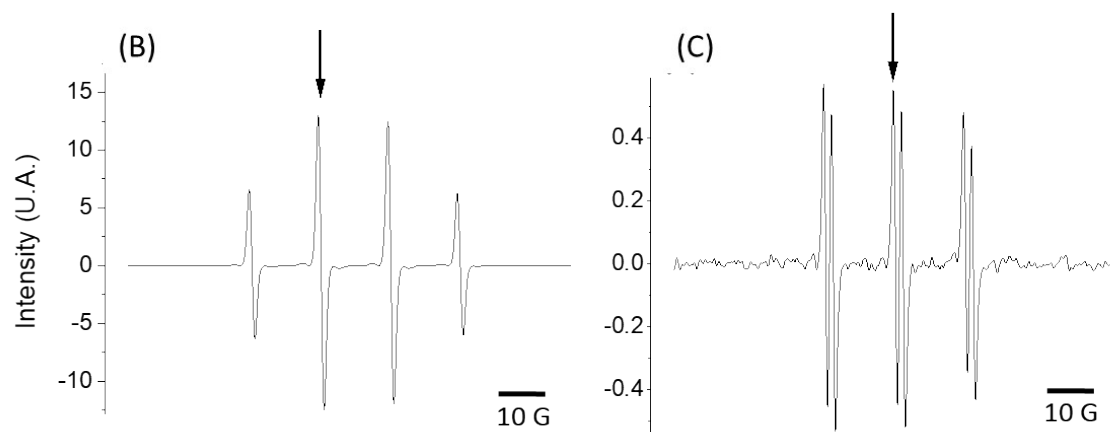

**Figure S1.** Identification of DMPO and POBN detected in this work by comparison of coupling constants (A) and shape of the DMPO- HO $\cdot$  (B) and POBN-HO $_2\cdot$  (C) adducts. The arrow indicates the selected peak from which the intensity was measured for the construction of 3D surface plots.

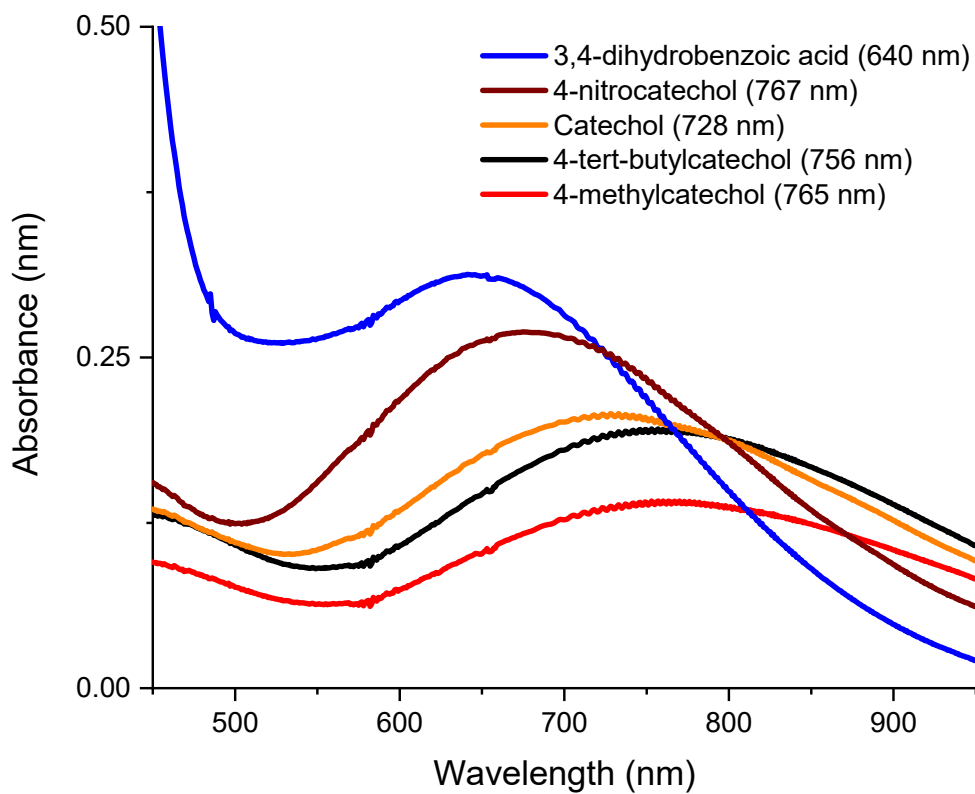

**Figure S2.** UV-Vis spectra of the ligand-iron monocomplex of catechol-like ligands used in this study and their respective  $\lambda_{\text{max}}$  in parenthesis.

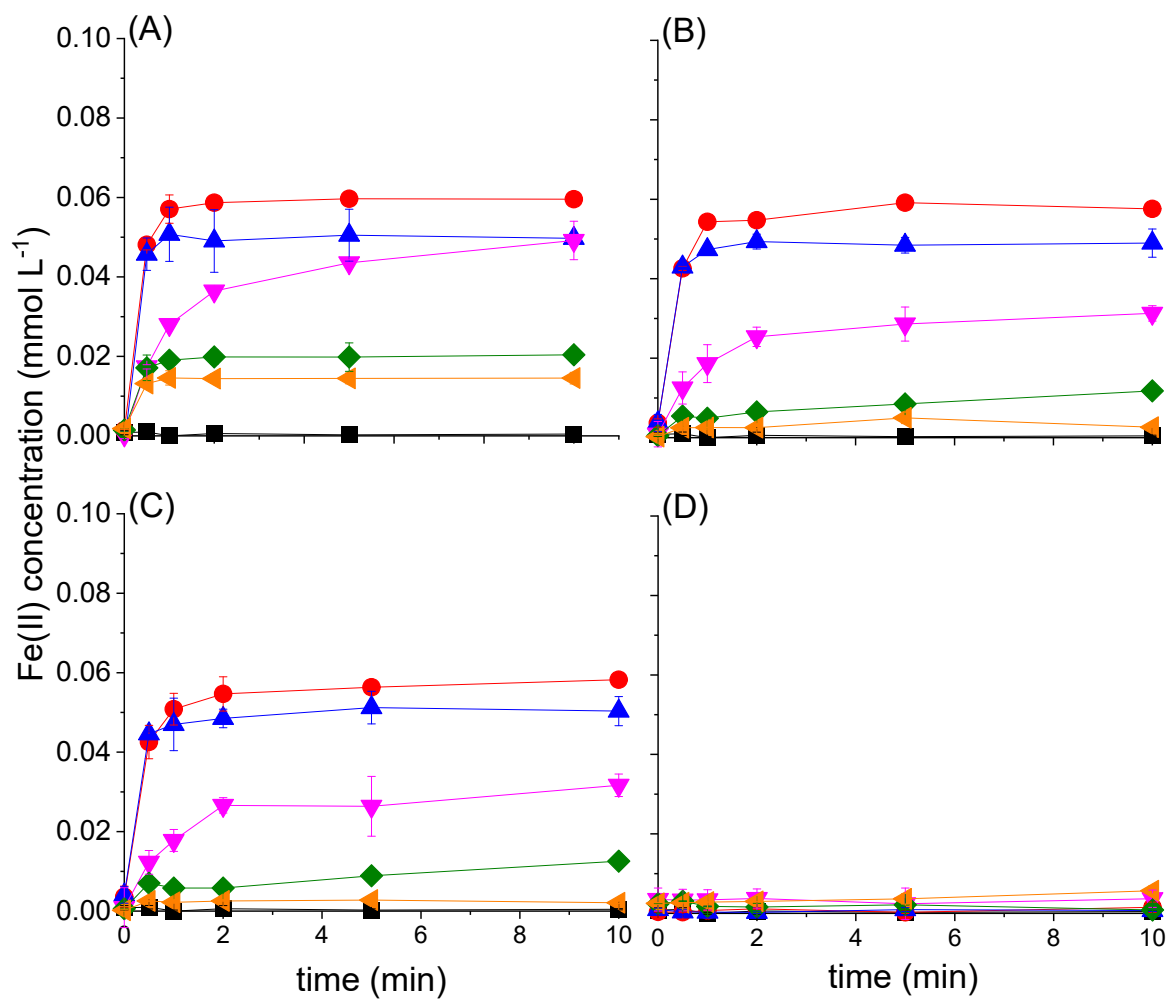

**Figure S3.** Iron reduction profile of ED ligands 4-tert-butylcatechol (● - red); 4-methylcatechol (▲ - blue); catechol (▼ - pink), and EW ligands 3,4-dihydroxybenzoic acid (◆ - green); 4-nitrocatechol (▲ - yellow). (A) pH 3.0; (B) pH 4.0; (C) pH 5.0; (D) pH 6.0.

## References

1. P. Salgado, V. Melin, Y. Duran, H. Mansilla and D. Contreras, *Environ Sci Technol*, 2017, **51**, 3687-3693.
2. Bruker Biospin, technical bulletin (available online at [www.syntechinnovation.com](http://www.syntechinnovation.com)).
3. E. Finkelstein, G. M. Rosen and E. J. Rauckman, *Molecular Pharmacology*, 1979, **16**, 676-685.
